# Supplementary material for: Stimulatory Secretions of Airway Epithelial Cells Accelerate Early Repair of Tracheal Epithelium
Source: PubMed Central journal article supplement (PMC5601923; doi:10.1038/s41598-017-11992-6), 2017-09-15
Supplement: 41598_2017_11992_MOESM1_ESM.pdf [file 41598_2017_11992_MOESM1_ESM.pdf]

# Stimulatory Secretions of Airway Epithelial Cells Accelerates Early Repair of Tracheal Epithelium

Egi Kardia, Rafeezul Mohamed, and Badrul Hisham Yahaya

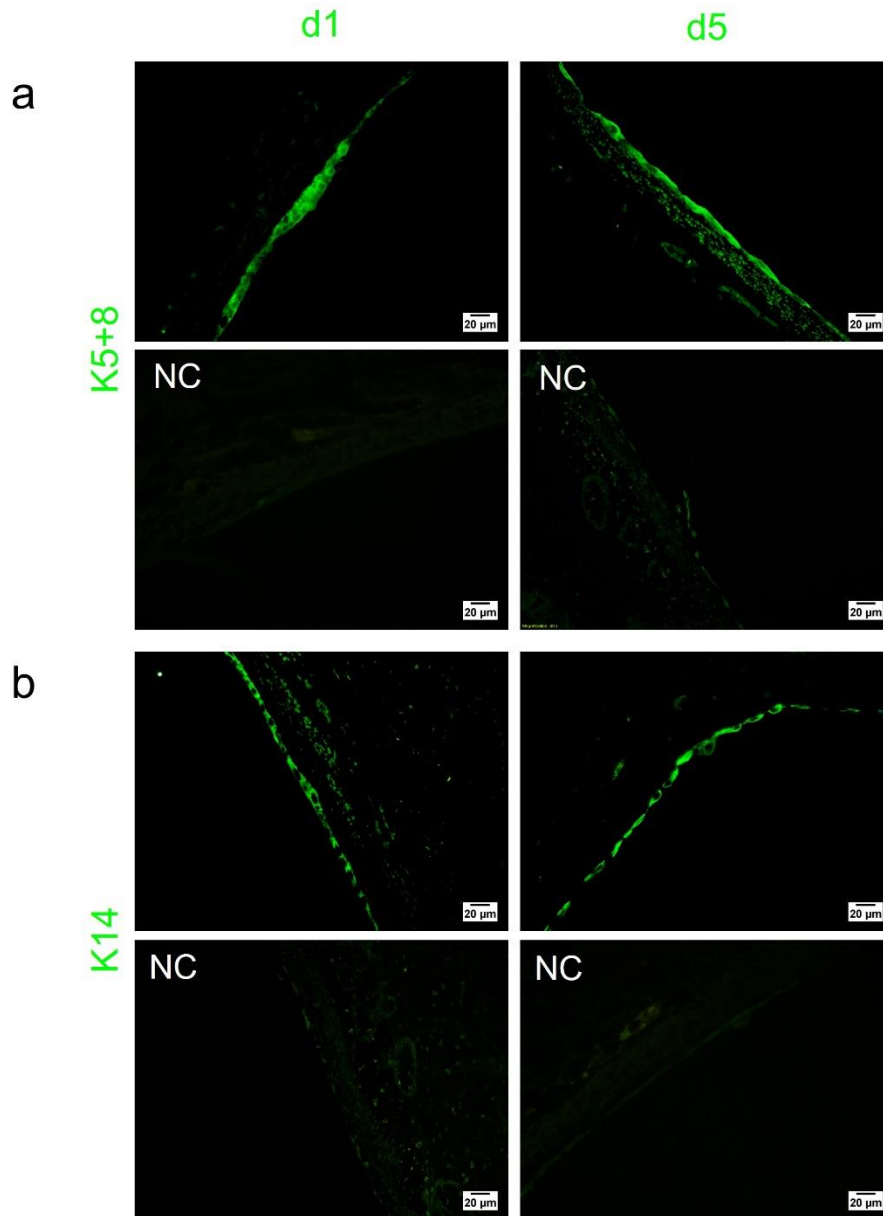

**Supplementary figure 1** Representative images of (a) K5+8 (green) and (b) K14 (green) staining of seeded AECs in the damaged tracheal basement membrane at day 1 and 5 following direct co-culture assay. The negative control samples (NC) were given the similar staining without primary antibody incubation (scale bars: 20 μm).

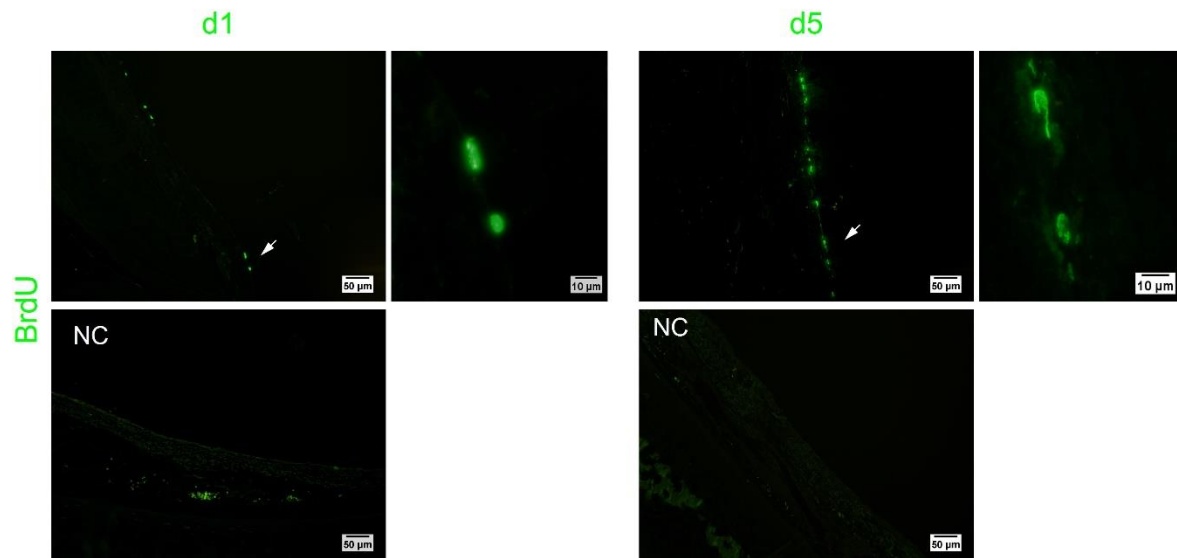

**Supplementary figure 2** Representative images of BrdU (green) staining of seeded AECs in the damaged tracheal basement membrane at day 1 and 5 following direct co-culture assay. Arrows indicate BrdU<sup>+</sup> cells that formed the lining of epithelium. The negative control samples (NC) were given the similar staining without primary antibody incubation (scale bars: 50 µm, scale bars of inserts represent 10 µm).

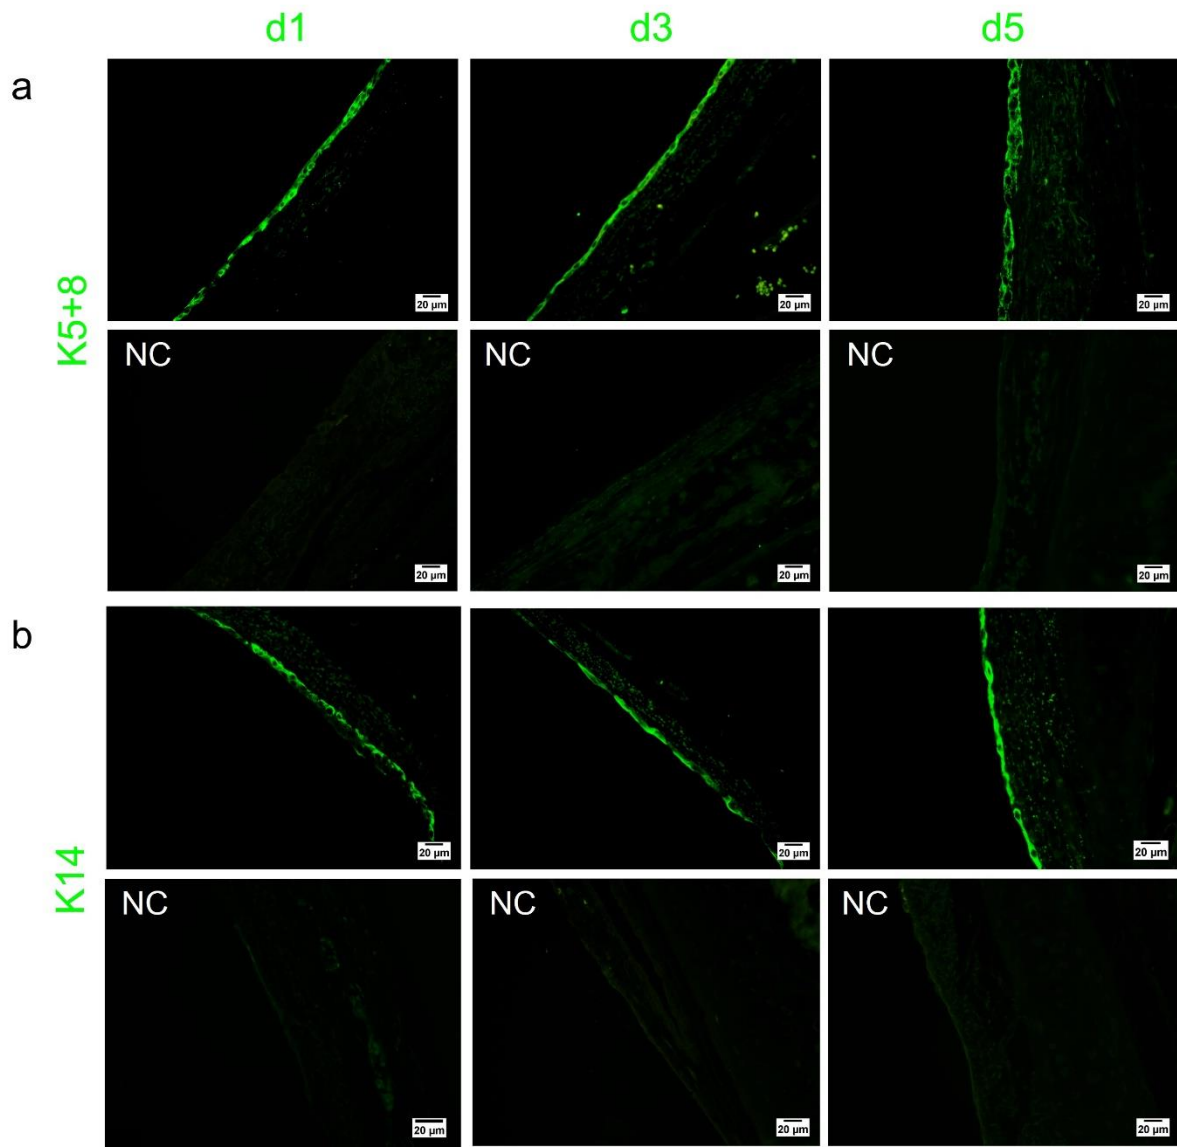

**Supplementary figure 3** Representative images of (a) K5+8 (green) and (b) K14 (green) staining of tracheal epithelium following indirect AEC co-culture assay at day 1, 3, and 5. The negative control samples (NC) were given the similar staining without primary antibody incubation (scale bars: 20 μm).

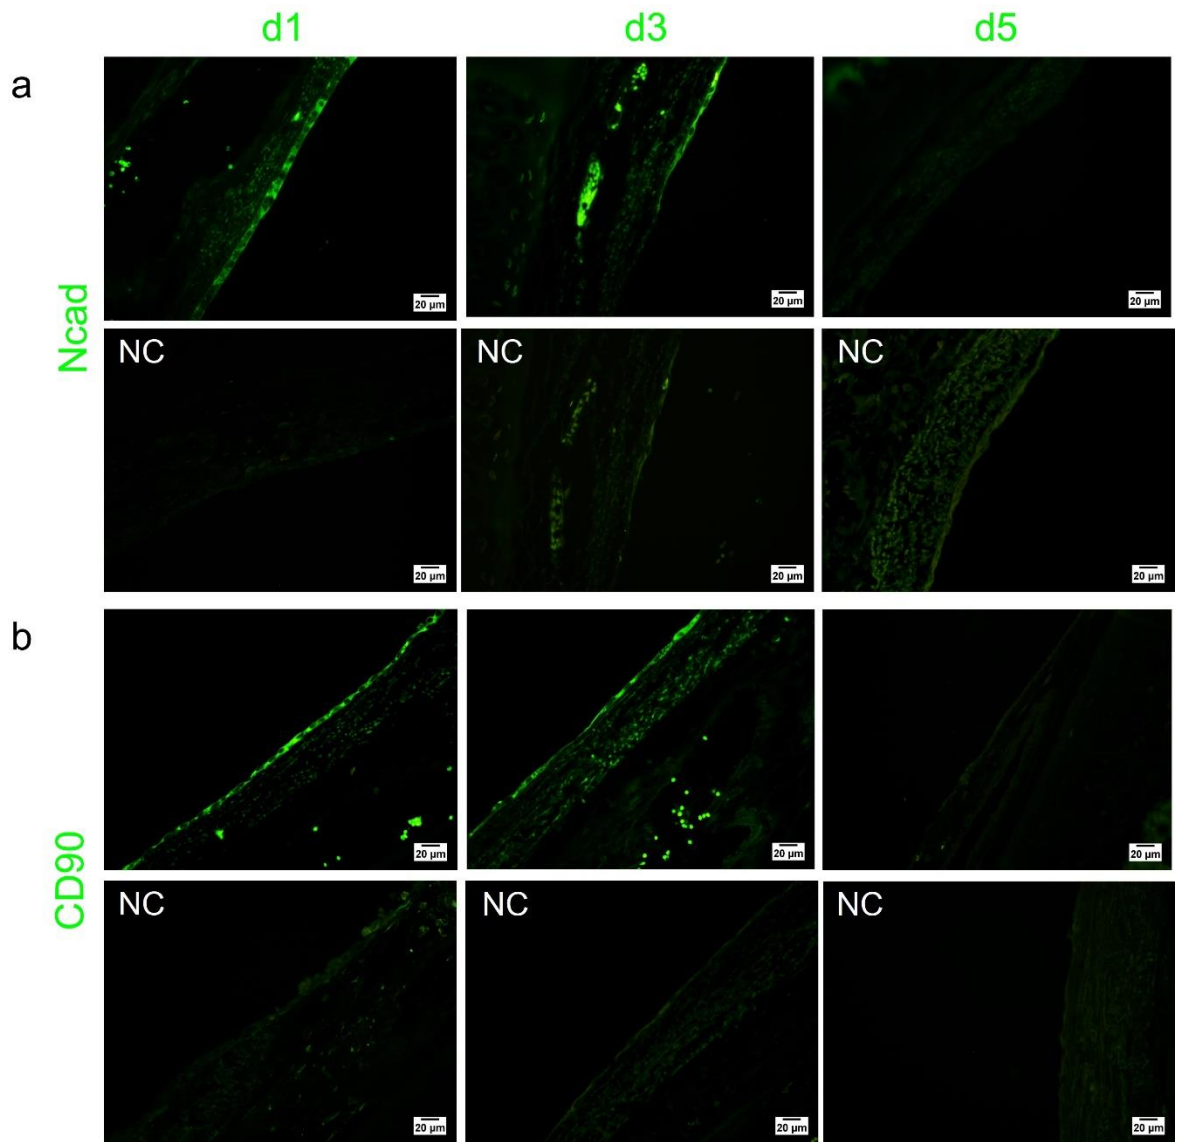

**Supplementary Figure 4** Representative images of (a) N-cadherin (green) and (b) CD90 (green) staining of tracheal epithelium following indirect AEC co-culture assay at day 1, 3, and 5. The negative control samples (NC) were given the similar staining without primary antibody incubation (scale bars: 20 μm).
